# Supplementary material
Source: PubMed Central journal article supplement (PMC2787685)
Supplement: NIHMS147405-supplement-01.pdf [file NIHMS147405-supplement-01.pdf]

## **Supplement to**

The Structure of Bioactive Gastrin-17 Analogs of the N-Terminal Region

Jeffrey Copps, Richard F. Murphy, and Sándor Lovas.

Creighton University School of Medicine, Department of Biomedical Sciences, 2500 California Plaza,  
Omaha, NE 68178

**Figure 1S.** ECD spectra of G17(1-6)-NH<sub>2</sub> in various solvents.

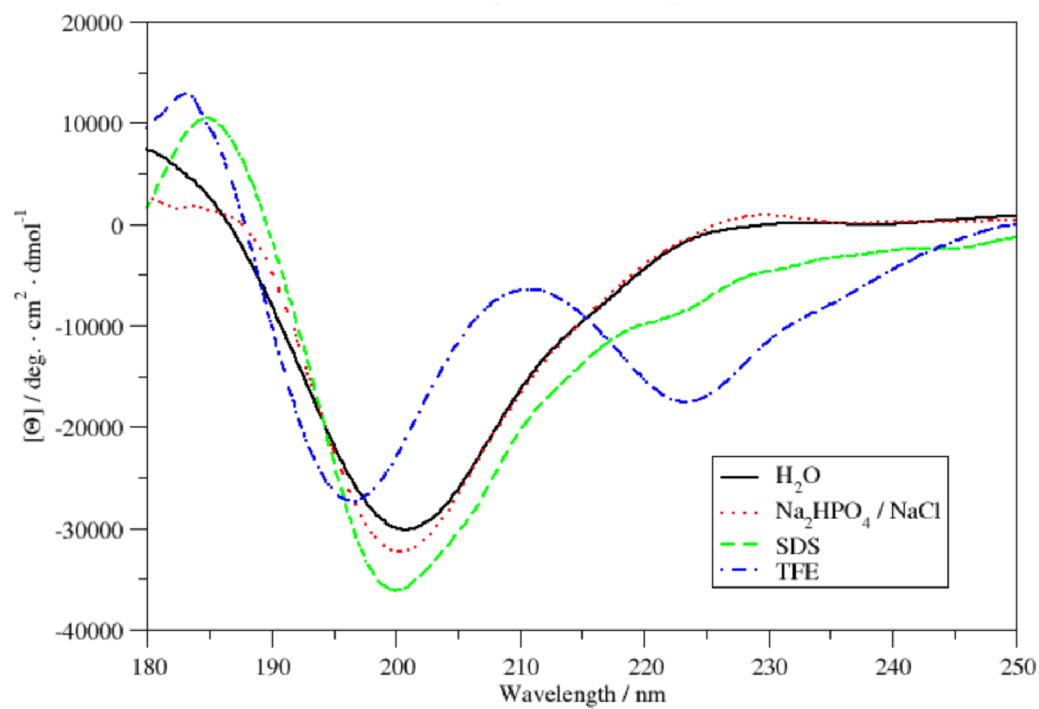

**Figure 2S.** ECD spectra of G17(1-6) in various solvents.

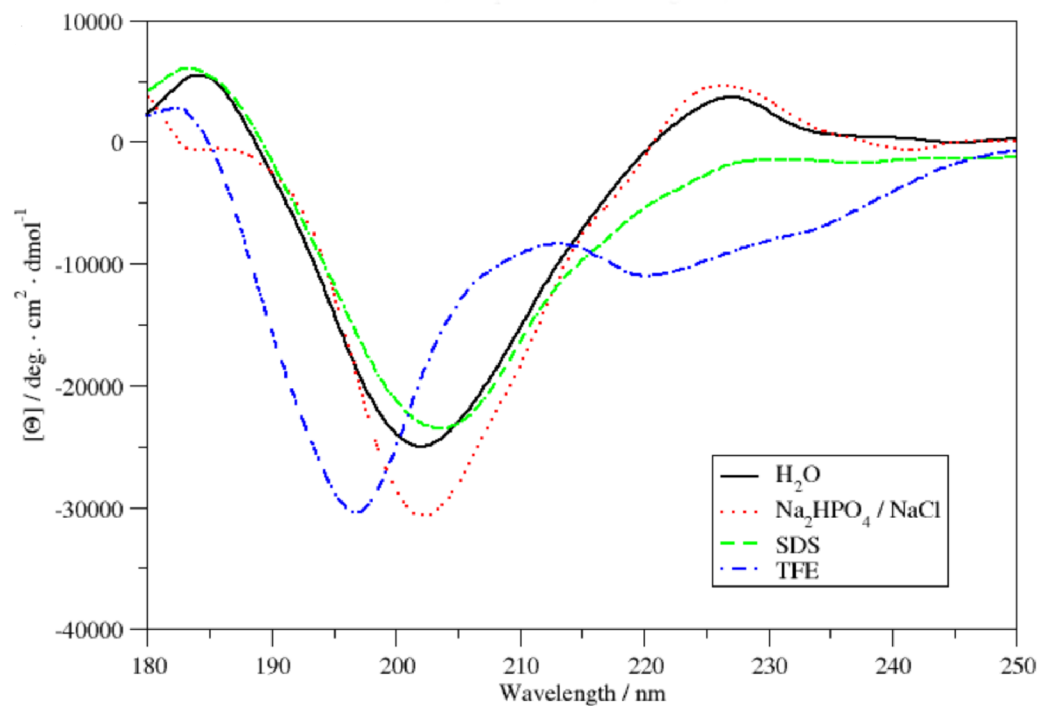

**Figure 3S.** ECD spectra of G17(1-5)-NH<sub>2</sub> in various solvents.

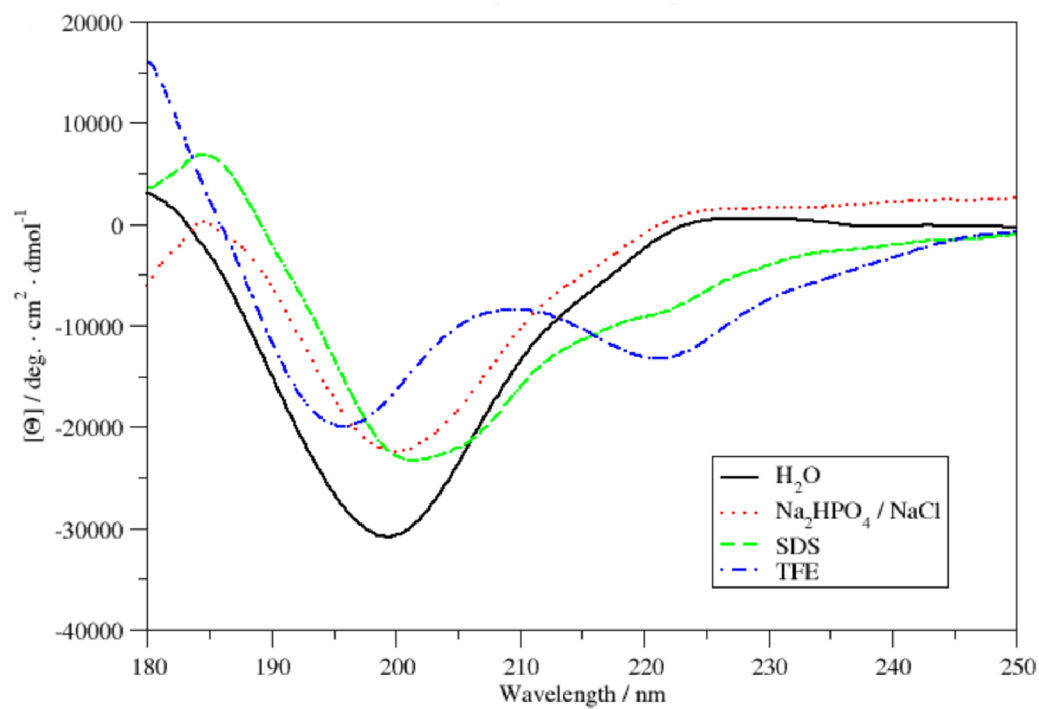

**Figure 4S.** ECD spectra of G17(1-5) in various solvents.

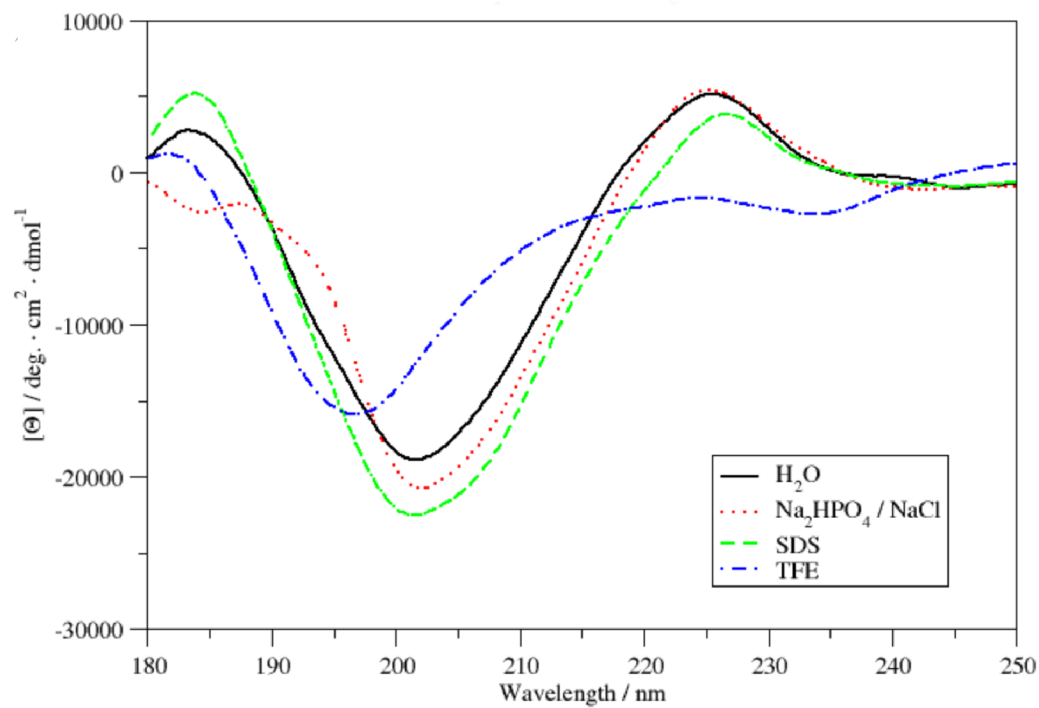

**Figure 5S.** ECD spectra of G17(1-4)-NH<sub>2</sub> in various solvents.

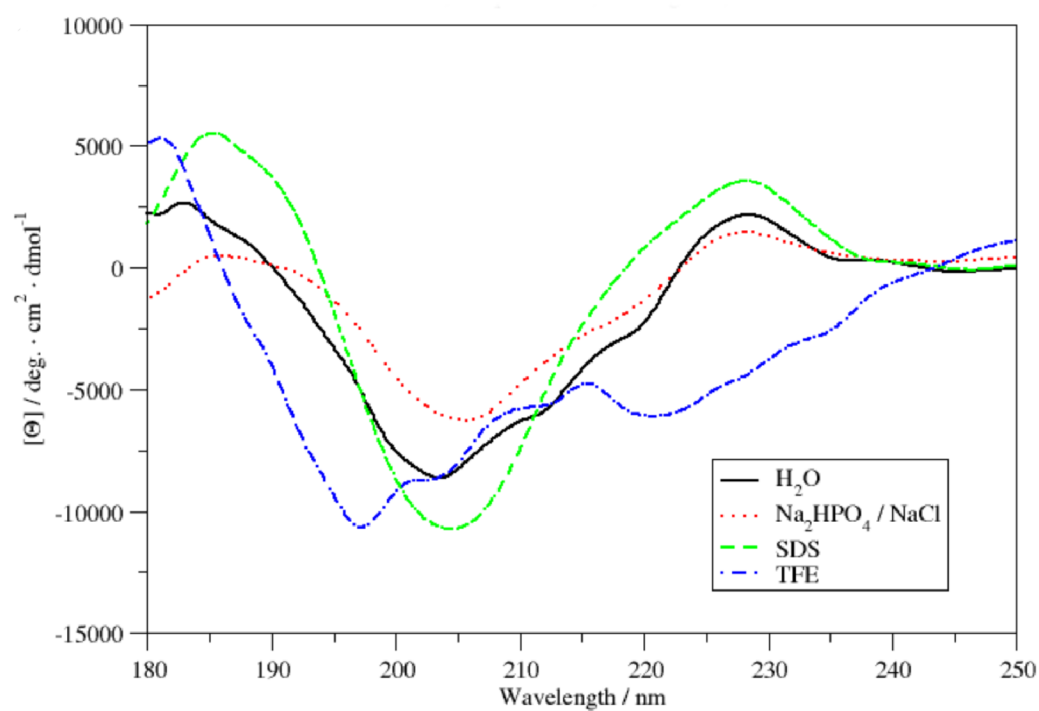

**Figure 6S.** ECD spectra of G17(1-4) in various solvents.

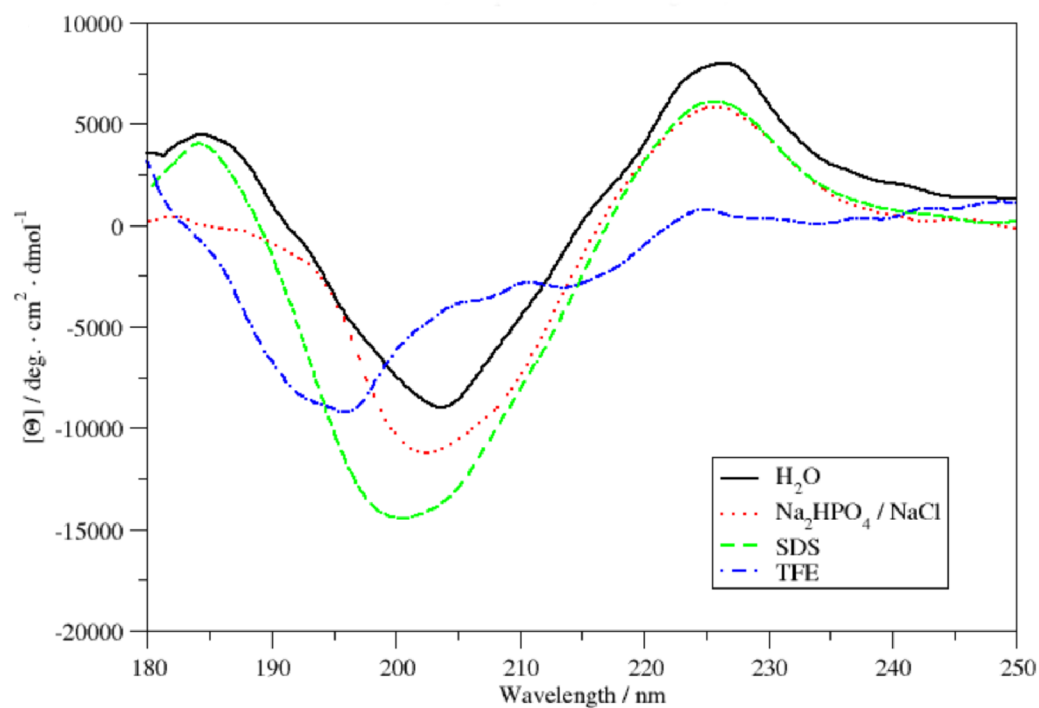

**Figure 7S.** – DSSP-calculated secondary structure of G17(1-12) as function of time during REMD simulations in different solvents. **A**, H<sub>2</sub>O; **B**, DMSO; **C**, TFE.

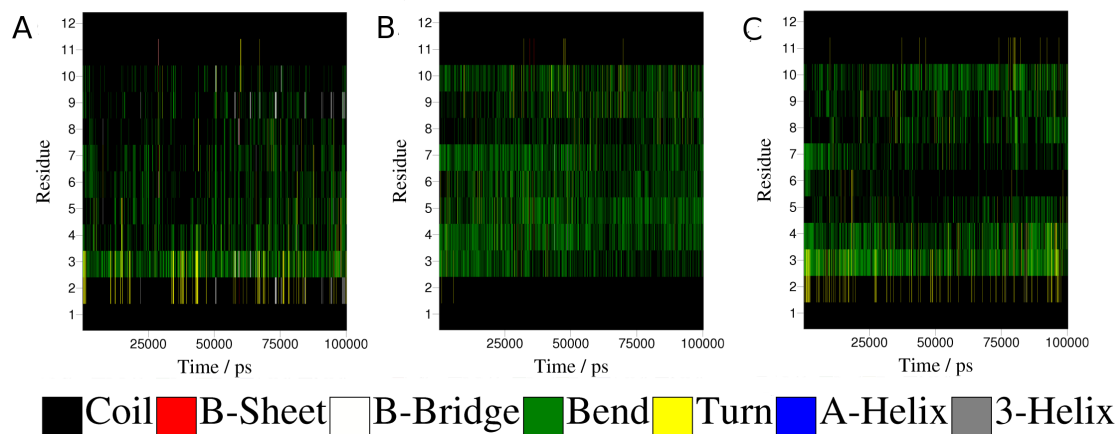

**Table 1S.** Cluster analysis of G17(1-12) REMD simulations.

| Peptide   | Solvent          | Structures in cluster number |    |    |    |    | Total number of clusters | Total number of structures | Cluster 1% of total structures |
|-----------|------------------|------------------------------|----|----|----|----|--------------------------|----------------------------|--------------------------------|
|           |                  | 1                            | 2  | 3  | 4  | 5  |                          |                            |                                |
| G17(1-12) | H <sub>2</sub> O | 37                           | 13 | 10 | 10 | 8  | 1581                     | 2003                       | 1.8                            |
|           | DMSO             | 85                           | 54 | 39 | 34 | 34 | 1268                     | 2003                       | 4.2                            |
|           | TFE              | 61                           | 27 | 21 | 19 | 17 | 997                      | 2003                       | 3.0                            |

**Figure 8S.** DSSP-calculated secondary structure of G17(1-6)-NH<sub>2</sub> as function of time during REMD simulations in different solvents. **A**, H<sub>2</sub>O; **B**, DMSO; **C**, TFE.

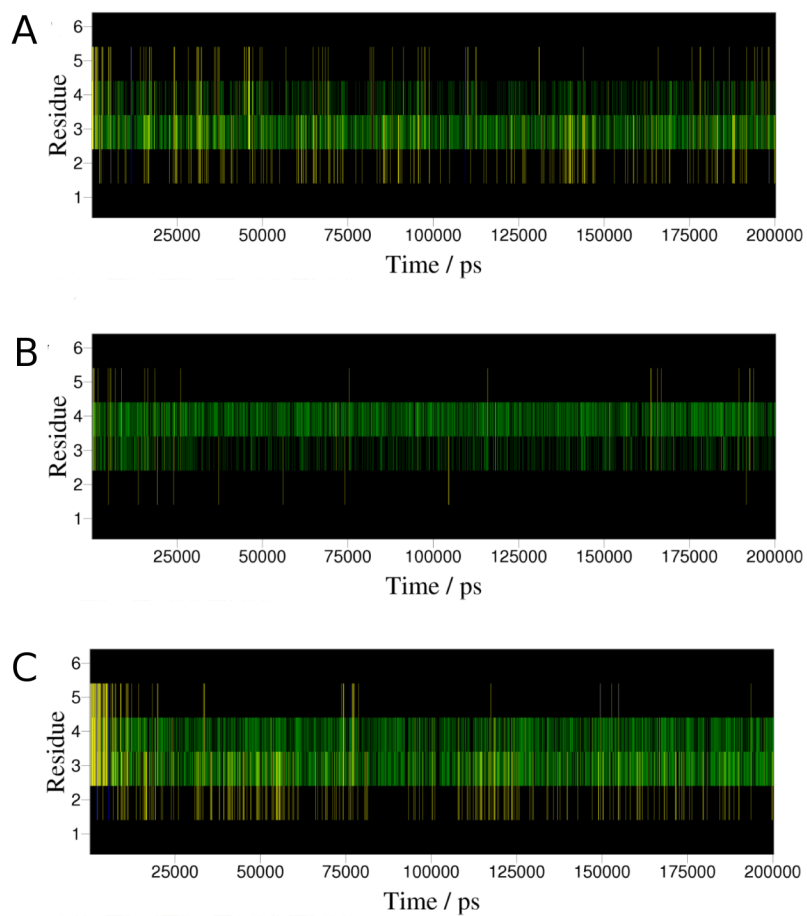

■ Coil ■ B-Sheet ■ B-Bridge ■ Bend ■ Turn ■ A-Helix ■ 3-Helix

**Figure 9S.** DSSP-calculated secondary structure of G17(1-6) as function of time during REMD simulations in different solvents. **A**, H<sub>2</sub>O; **B**, DMSO; **C**, TFE.

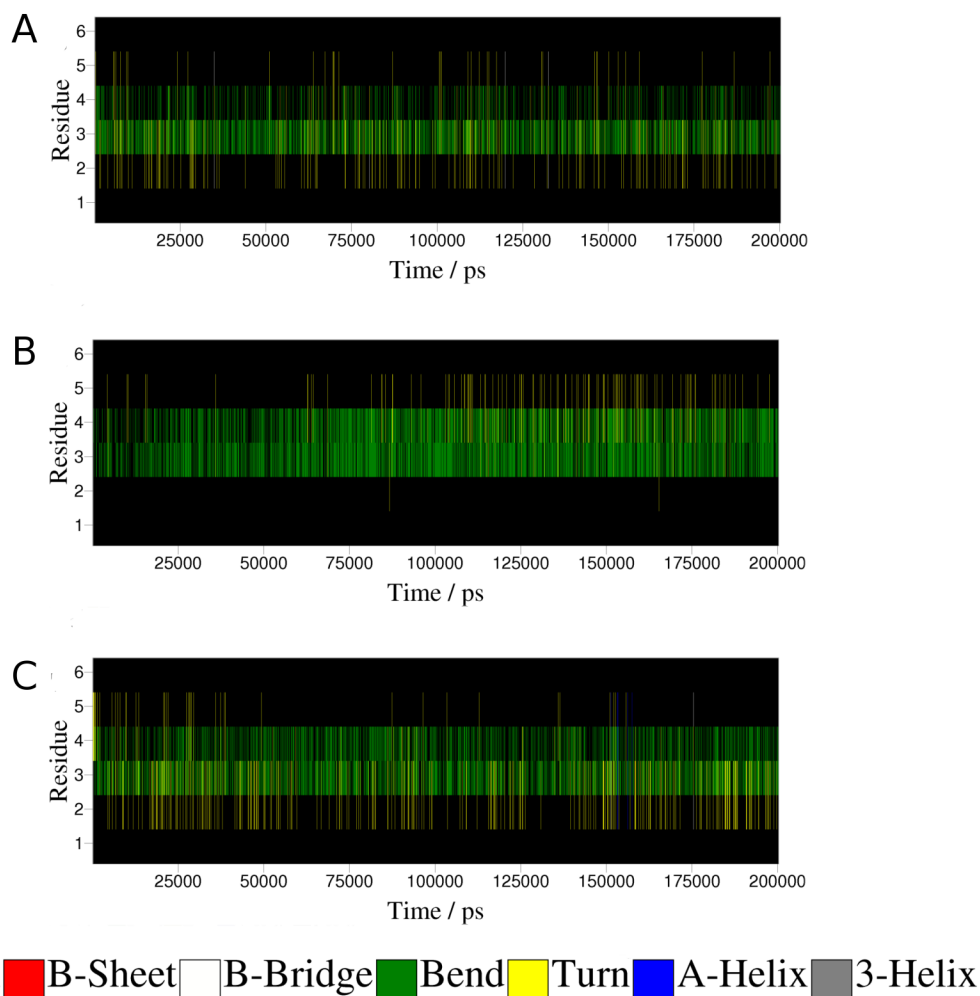

**Table 2S.** Cluster analysis of G17(1-6)-NH<sub>2</sub> and G17(1-6) REMD simulations.

| Peptide                  | Solvent          | Structures in cluster number |     |     |     |     | Total number of clusters | Total number of structures | Cluster 1% of total structures |
|--------------------------|------------------|------------------------------|-----|-----|-----|-----|--------------------------|----------------------------|--------------------------------|
|                          |                  | 1                            | 2   | 3   | 4   | 5   |                          |                            |                                |
| G17(1-6)-NH <sub>2</sub> | H <sub>2</sub> O | 882                          | 383 | 250 | 240 | 169 | 151                      | 4003                       | 22                             |
|                          | DMSO             | 1100                         | 761 | 194 | 193 | 169 | 115                      | 4003                       | 27.5                           |
|                          | TFE              | 865                          | 334 | 301 | 237 | 206 | 151                      | 4003                       | 21.6                           |
| G17(1-6)                 | H <sub>2</sub> O | 1051                         | 528 | 292 | 222 | 194 | 89                       | 4003                       | 26.2                           |
|                          | DMSO             | 1851                         | 523 | 407 | 134 | 117 | 67                       | 4003                       | 46.2                           |
|                          | TFE              | 561                          | 548 | 385 | 251 | 202 | 98                       | 4003                       | 14                             |

**Figure 10S.** DSSP-calculated secondary structure of G17(1-5)-NH<sub>2</sub> as function of time during REMD simulations in different solvents. **A**, H<sub>2</sub>O; **B**, DMSO; **C**, TFE.

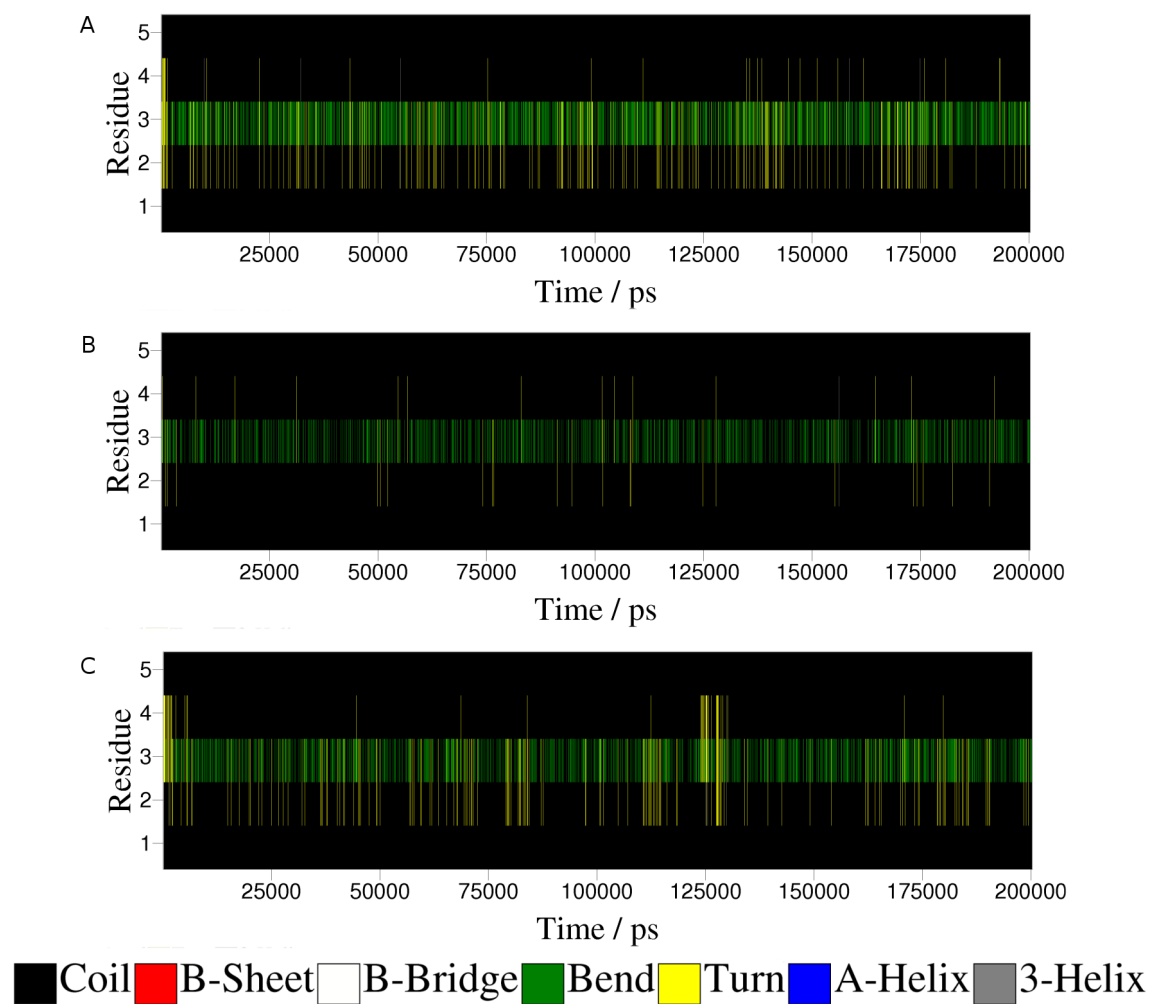



**Figure 11S.** DSSP-calculated secondary structure of G17(1-5) as function of time during REMD simulations in different solvents. **A**, H<sub>2</sub>O; **B**, DMSO; **C**, TFE.

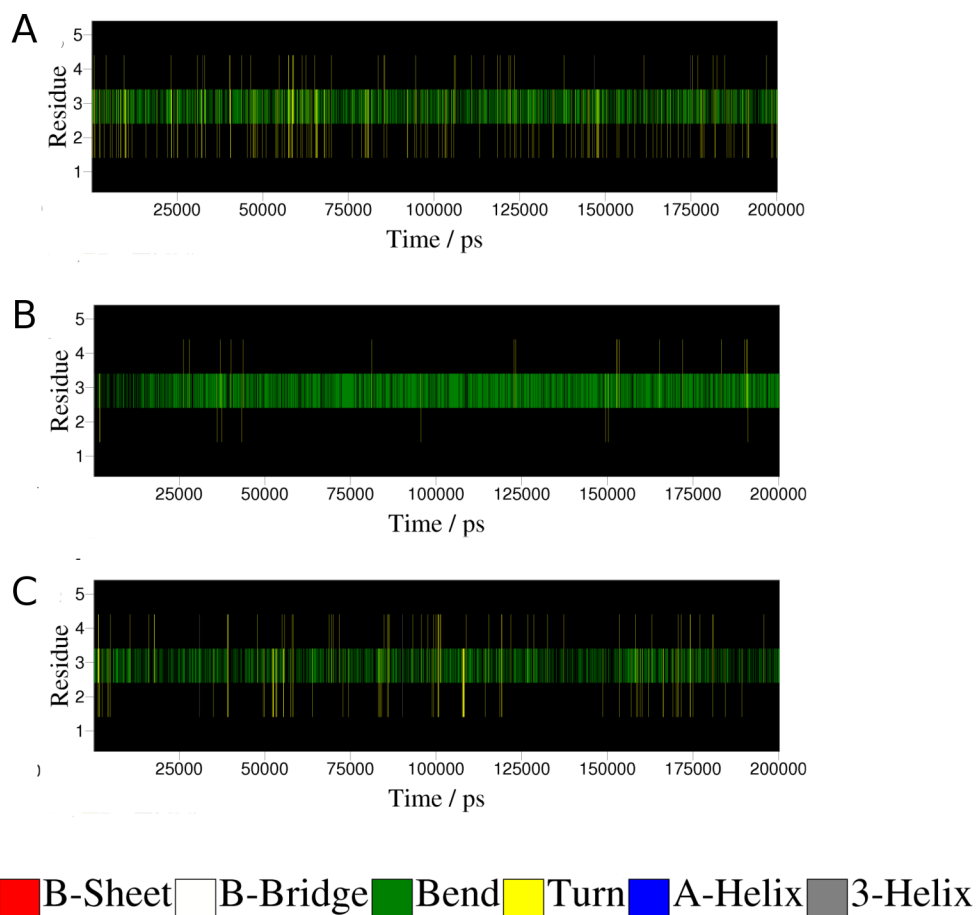

**Table 3S.** Cluster analysis of G17(1-5)-NH<sub>2</sub> and G17(1-5) REMD simulations.

| Peptide                  | Solvent          | Structures in cluster number |      |     |     |     | Total number of clusters | Total number of structures | Cluster 1% of total structures |
|--------------------------|------------------|------------------------------|------|-----|-----|-----|--------------------------|----------------------------|--------------------------------|
|                          |                  | 1                            | 2    | 3   | 4   | 5   |                          |                            |                                |
| G17(1-5)-NH <sub>2</sub> | H <sub>2</sub> O | 1605                         | 790  | 362 | 207 | 191 | 47                       | 4003                       | 40.1                           |
|                          | DMSO             | 1100                         | 1031 | 346 | 246 | 233 | 45                       | 4003                       | 27.5                           |
|                          | TFE              | 1641                         | 584  | 539 | 299 | 207 | 41                       | 4003                       | 41                             |
| G17(1-5)                 | H <sub>2</sub> O | 1754                         | 714  | 357 | 315 | 188 | 28                       | 4003                       | 43.8                           |
|                          | DMSO             | 2479                         | 599  | 464 | 168 | 66  | 24                       | 4003                       | 61.9                           |
|                          | TFE              | 1343                         | 688  | 549 | 241 | 240 | 34                       | 4003                       | 33.5                           |

**Figure 12S.** DSSP-calculated secondary structure of G17(1-4)-NH<sub>2</sub> as function of time during REMD simulations in different solvents. **A**, H<sub>2</sub>O; **B**, DMSO; **C**, TFE.

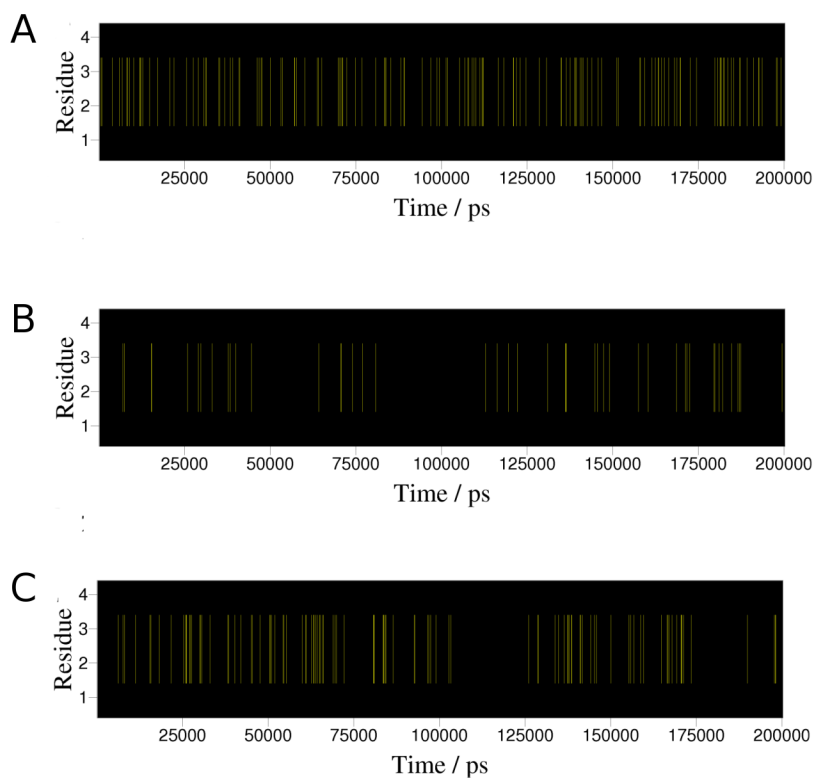

■ Coil ■ B-Sheet ■ B-Bridge ■ Bend ■ Turn ■ A-Helix ■ 3-Helix

**Figure 13S.** DSSP-calculated secondary structure of G17(1-4) as function of time during REMD simulations in different solvents. **A**, H<sub>2</sub>O; **B**, DMSO; **C**, TFE.

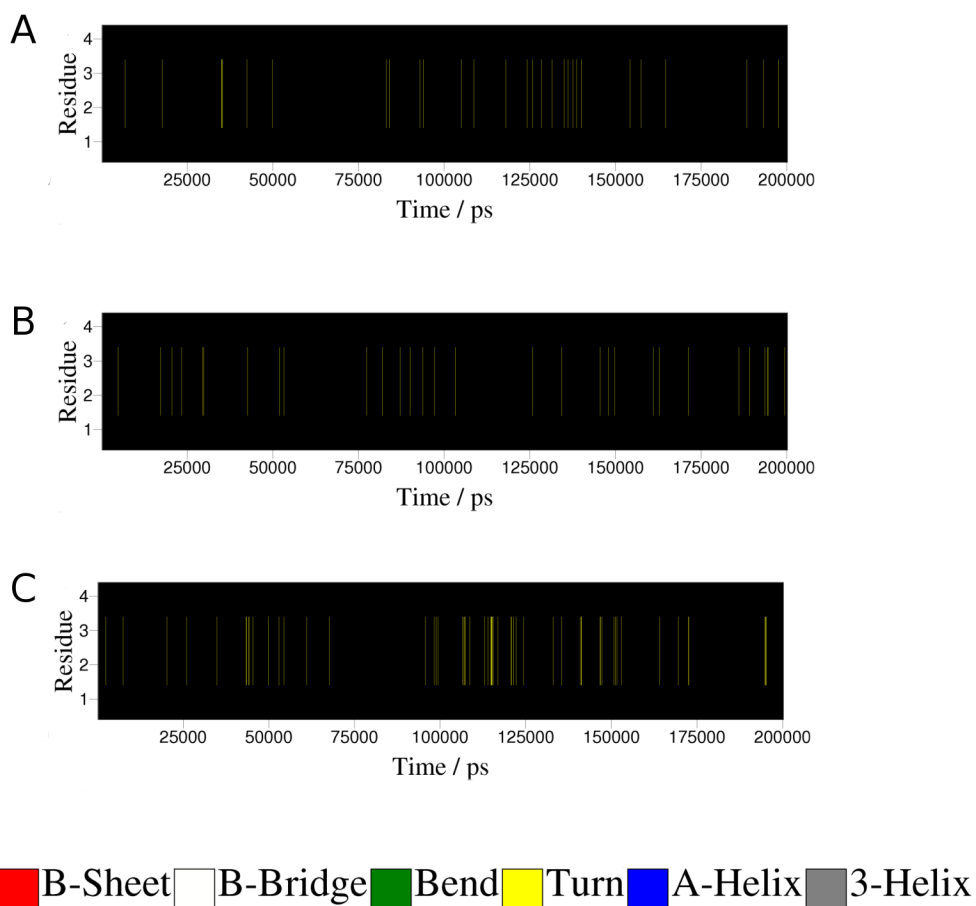

**Table 4S.** Cluster analysis of G17(1-4)-NH<sub>2</sub> and G17(1-4) REMD simulations.

| Peptide                  | Solvent          | Structures in cluster number |     |     |     |     | Total number of clusters | Total number of structures | Cluster 1% of total structures |
|--------------------------|------------------|------------------------------|-----|-----|-----|-----|--------------------------|----------------------------|--------------------------------|
|                          |                  | 1                            | 2   | 3   | 4   | 5   |                          |                            |                                |
| G17(1-4)-NH <sub>2</sub> | H <sub>2</sub> O | 2402                         | 989 | 374 | 85  | 51  | 12                       | 4003                       | 60                             |
|                          | DMSO             | 2388                         | 713 | 530 | 161 | 137 | 12                       | 4003                       | 59.7                           |
|                          | TFE              | 2523                         | 721 | 447 | 123 | 79  | 13                       | 4003                       | 63                             |
| G17(1-4)                 | H <sub>2</sub> O | 2828                         | 805 | 302 | 37  | 19  | 8                        | 4003                       | 70.6                           |
|                          | DMSO             | 2855                         | 848 | 144 | 124 | 18  | 7                        | 4003                       | 71.3                           |
|                          | TFE              | 2781                         | 580 | 521 | 76  | 26  | 9                        | 4003                       | 69.5                           |
